# Supplementary material
Source: publisher figshare collection journal article supplement (https://geolsoc.figshare.com/ndownloader/files/5422847)
Supplement: Supplementary file 1 [file 5422847]

Table 3d Major oxide, trace element and Sr-Nd-Pb compositions of the Hulu complex
Sample no.	XHL05-1	XHL05-2	XHL05-3	XHL05-4	XHL05-5	XHL05-7	XHL05-8	XHL05-9	XHL05-10		XHL05-11	XHL05-12	XHL05-13	XHL05-14
Rock type	Hornblende harzburgite										Hornblende olivine websterite
Oxides (wt%)
SiO2	38.6	39.2	37.2	36.9	38.0	38.3	38.7	38.5	37.7		36.0	35.2	32.2	26.6
TiO2	0.13	0.21	0.10	0.11	0.36	0.14	0.15	0.26	0.18		0.26	0.26	0.19	0.16
Al2O3	4.79	3.63	3.51	4.12	3.01	4.39	4.63	4.17	4.60		4.84	4.79	3.94	2.59
(Fe2O3)T	11.8	12.7	11.9	11.9	12.4	11.4	11.7	11.4	11.7		23.6	22.0	24.3	35.8
MnO	0.11	0.12	0.11	0.11	0.11	0.10	0.10	0.15	0.16		0.15	0.15	0.14	0.12
MgO	29.1	32.8	32.0	31.5	31.5	31.8	32.4	33.5	31.4		19.7	22.0	24.2	18.2
CaO	3.28	2.04	2.52	1.75	1.08	1.93	1.48	1.90	2.06		4.29	4.51	2.15	1.90
Na2O	1.29	0.45	0.80	1.01	0.39	0.56	0.29	0.02	0.00		0.10	0.04	0.00	0.00
K2O	0.06	0.04	0.06	0.06	0.03	0.05	0.40	0.04	0.05		0.03	0.00	0.03	0.00
P2O5	0.04	0.03	0.03	0.04	0.04	0.04	0.04	0.04	0.04		0.04	0.04	0.05	0.00
S	n.d.	n.d.	n.d.	n.d.	n.d.	n.d.	n.d.	n.d.	n.d.		8.61	6.68	7.16	12.88
LOI	9.89	7.75	10.7	11.5	11.8	10.2	8.97	9.45	10.6		9.13	9.48	11.1	12.8
Total	99.0	99.0	98.9	99.0	98.8	99.0	98.9	99.8	98.8		98.4	98.7	98.6	98.4
n.d.= not determined
Trace elements (ppm)
Sc	12.6	12.0	12.1	9.66	11.7	11.2	9.90	13.8	14.5		11.7	12.1	10.6	9.19
Cr	1757	2118	2107	1990	2023	2305	2326	2383	2327		1981	1498	1766	1605
Co	88.2	108	102	95.1	91.8	106	111	108	133		461	298	345	580
Ni	469	552	557	557	552	615	589	619	741		10596	6277	8023	14873
Cu	38.3	55.0	21.1	55.7	68.5	62.2	61.6	110	102		1056	1719	1256	1674
Rb	0.458	0.664	1.80	1.12	0.769	1.27	10.8	0.880	1.52		0.190	0.299	0.634	0.463
Sr	120	46.4	88.0	51.2	36.4	61.7	64.7	61.6	54.3		49.3	111.9	68.5	31.4
Y	4.03	4.09	3.30	3.35	4.83	4.02	3.42	5.64	4.93		5.97	6.05	4.63	3.15
Zr	12.8	11.5	8.29	14.3	34.4	14.0	16.8	15.9	18.7		21.8	24.7	23.9	17.1
Nb	0.299	0.607	0.316	0.325	0.978	0.471	0.495	0.795	0.601		0.727	0.709	0.573	0.418
Ba	6.74	9.41	12.1	5.27	3.48	15.6	78.0	7.05	6.42		1.49	1.80	4.50	2.87
La	1.43	1.55	1.24	1.48	2.51	1.56	1.48	2.25	1.90		1.64	2.01	2.25	1.47
Ce	2.96	3.36	2.50	2.96	5.03	3.39	3.36	4.81	4.47		4.03	4.88	5.00	3.21
Pr	0.411	0.462	0.340	0.418	0.689	0.446	0.449	0.600	0.630		0.624	0.712	0.682	0.428
Nd	1.99	2.21	1.52	1.94	3.29	2.28	2.02	2.91	2.61		2.92	3.39	2.99	2.25
Sm	0.432	0.562	0.377	0.508	0.73	0.629	0.460	0.681	0.653		0.820	0.951	0.715	0.477
Eu	0.234	0.181	0.162	0.162	0.166	0.186	0.154	0.214	0.190		0.208	0.281	0.242	0.170
Gd	0.582	0.534	0.428	0.483	0.782	0.486	0.551	0.795	0.740		0.911	0.888	0.718	0.495
Tb	0.102	0.117	0.097	0.096	0.148	0.118	0.095	0.141	0.129		0.162	0.185	0.128	0.086
Dy	0.685	0.692	0.554	0.563	0.905	0.680	0.521	0.804	0.769		1.00	1.04	0.809	0.522
Ho	0.157	0.151	0.102	0.118	0.175	0.135	0.109	0.187	0.151		0.205	0.217	0.158	0.108
Er	0.466	0.420	0.372	0.373	0.546	0.415	0.366	0.541	0.555		0.618	0.640	0.447	0.320
Tm	0.061	0.064	0.044	0.054	0.087	0.055	0.054	0.072	0.078		0.076	0.090	0.070	0.045
Yb	0.403	0.418	0.299	0.285	0.488	0.404	0.305	0.503	0.491		0.524	0.583	0.436	0.294
Lu	0.065	0.060	0.052	0.054	0.080	0.058	0.055	0.079	0.085		0.086	0.080	0.060	0.040
Hf	0.416	0.366	0.284	0.401	1.04	0.426	0.469	0.467	0.447		0.653	0.726	0.644	0.439
Ta	0.036	0.057	0.033	0.032	0.101	0.047	0.035	0.059	0.045		0.054	0.057	0.045	0.045
Th	0.434	0.520	0.353	0.446	0.896	0.546	0.566	0.686	0.616		0.432	0.491	0.527	0.385
U	0.160	0.238	0.115	0.128	0.262	0.162	0.188	0.224	0.174		0.132	0.166	0.183	0.137
Pb	2.69	2.68	3.43	3.41	2.40	3.29	3.14	2.59	3.69		4.46	27.7	17.4	55.3
Isotopes
87Rb/86Sr	0.0110	0.0414	0.0591	0.0633	0.0612	0.0595	0.4831	0.0413	0.0810		0.0111	0.0077	0.0268	0.0427
87Sr/86Sr	0.703831	0.703979	0.703954	0.704027	0.704053	0.704074	0.705400	0.703868	0.703930		0.704081	0.703952	0.703999	0.704148
(87Sr/86Sr)ia	0.703788	0.703818	0.703724	0.703780	0.703815	0.703842	0.703517	0.703707	0.703614		0.704038	0.703922	0.703895	0.703982
147Sm/144Nd	0.1310	0.1534	0.1498	0.1584	0.1344	0.1669	0.1374	0.1416	0.1510		0.1695	0.1696	0.1443	0.1283
143Nd/144Nd	0.512872	0.512861	0.512851	0.512843	0.512844	0.512880	0.512783	0.512816	0.512831		0.512862	0.512892	0.512870	0.512847
(143Nd/144Nd)ia	0.512640	0.512590	0.512586	0.512563	0.512607	0.512585	0.512540	0.512566	0.512564		0.512562	0.512592	0.512615	0.512620
?Nd (274 Ma)	6.83	5.85	5.78	5.32	6.17	5.75	4.87	5.37	5.34		5.31	5.89	6.34	6.44
208Pb/204Pb	38.173	37.952	38.028	38.073	38.096	38.349	38.041	38.566	38.256		38.253	38.020	37.829	37.843
207Pb/204Pb	15.531	15.520	15.535	15.539	15.532	15.572	15.529	15.627	15.567		15.578	15.541	15.508	15.521
206Pb/204Pb	18.284	18.112	18.203	18.206	18.285	18.022	18.209	18.377	18.294		18.148	18.127	18.038	18.036
(206Pb/204Pb)ia	18.095	17.830	18.096	18.086	17.937	17.865	18.019	18.102	18.144		18.054	18.108	18.005	18.028
(207Pb/204Pb)ia	15.521	15.505	15.529	15.533	15.514	15.564	15.519	15.613	15.559		15.573	15.540	15.506	15.521
(208Pb/204Pb)ia	38.011	37.757	37.924	37.941	37.719	38.182	37.860	38.300	38.088		38.155	38.002	37.798	37.836
a Initial Sr, Nd, and Pb isotopic ratios at T=274 Ma, calculated using single-stage model
